# Supplementary material for: MLP-deficient human pluripotent stem cell derived cardiomyocytes develop hypertrophic cardiomyopathy and heart failure phenotypes due to abnormal calcium handling
Source: PubMed Central journal article supplement (PMC6690906; doi:10.1038/s41419-019-1826-4), 2019-08-13

# Figure S1

**A**

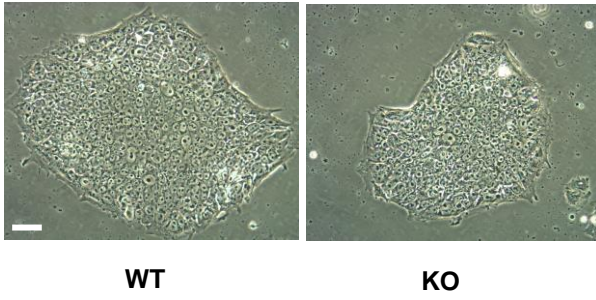

**B**

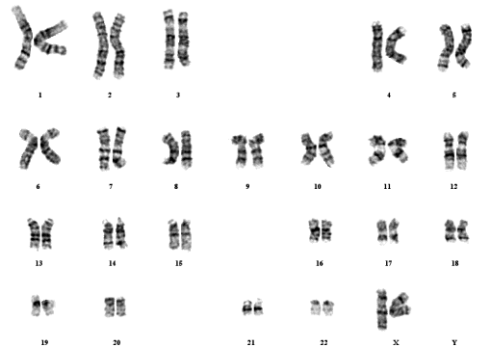

**C**

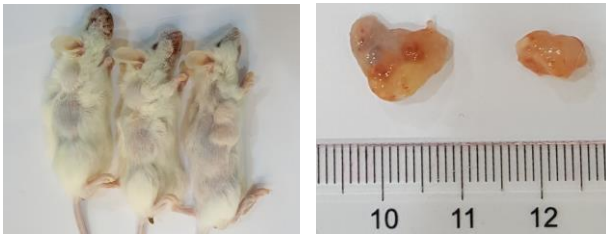

**D**

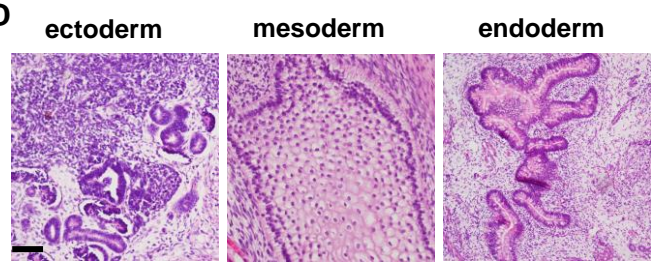

**E**

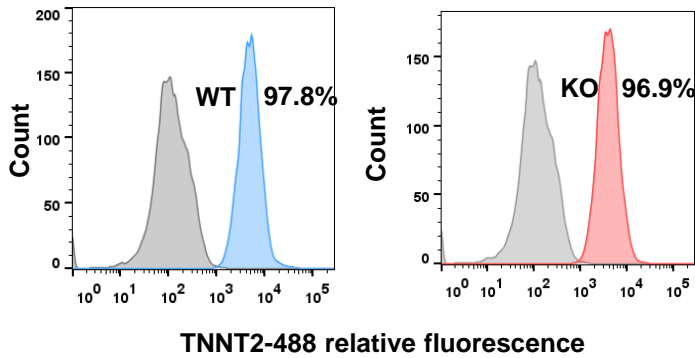

**F**

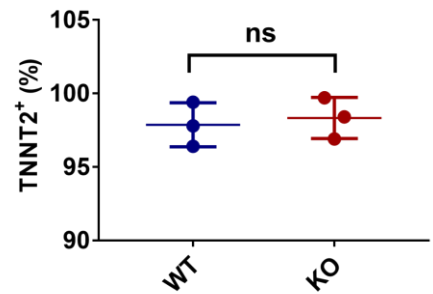

**Figure S2**

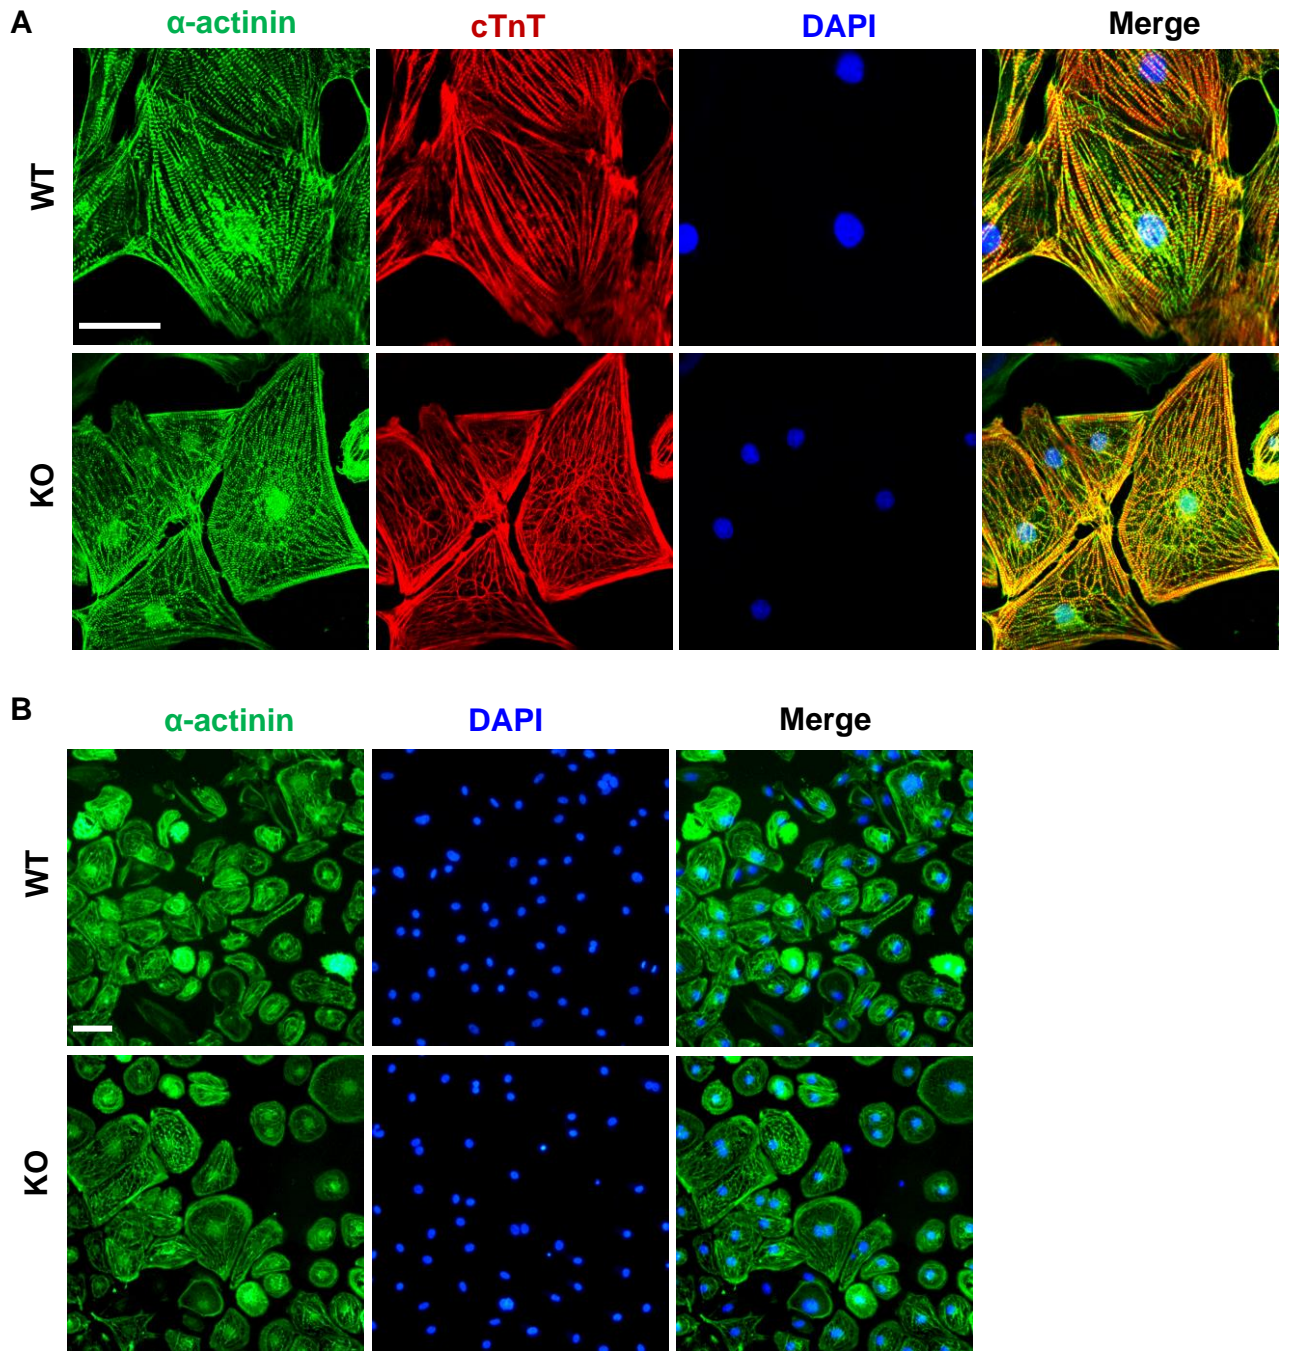

**Figure S3**

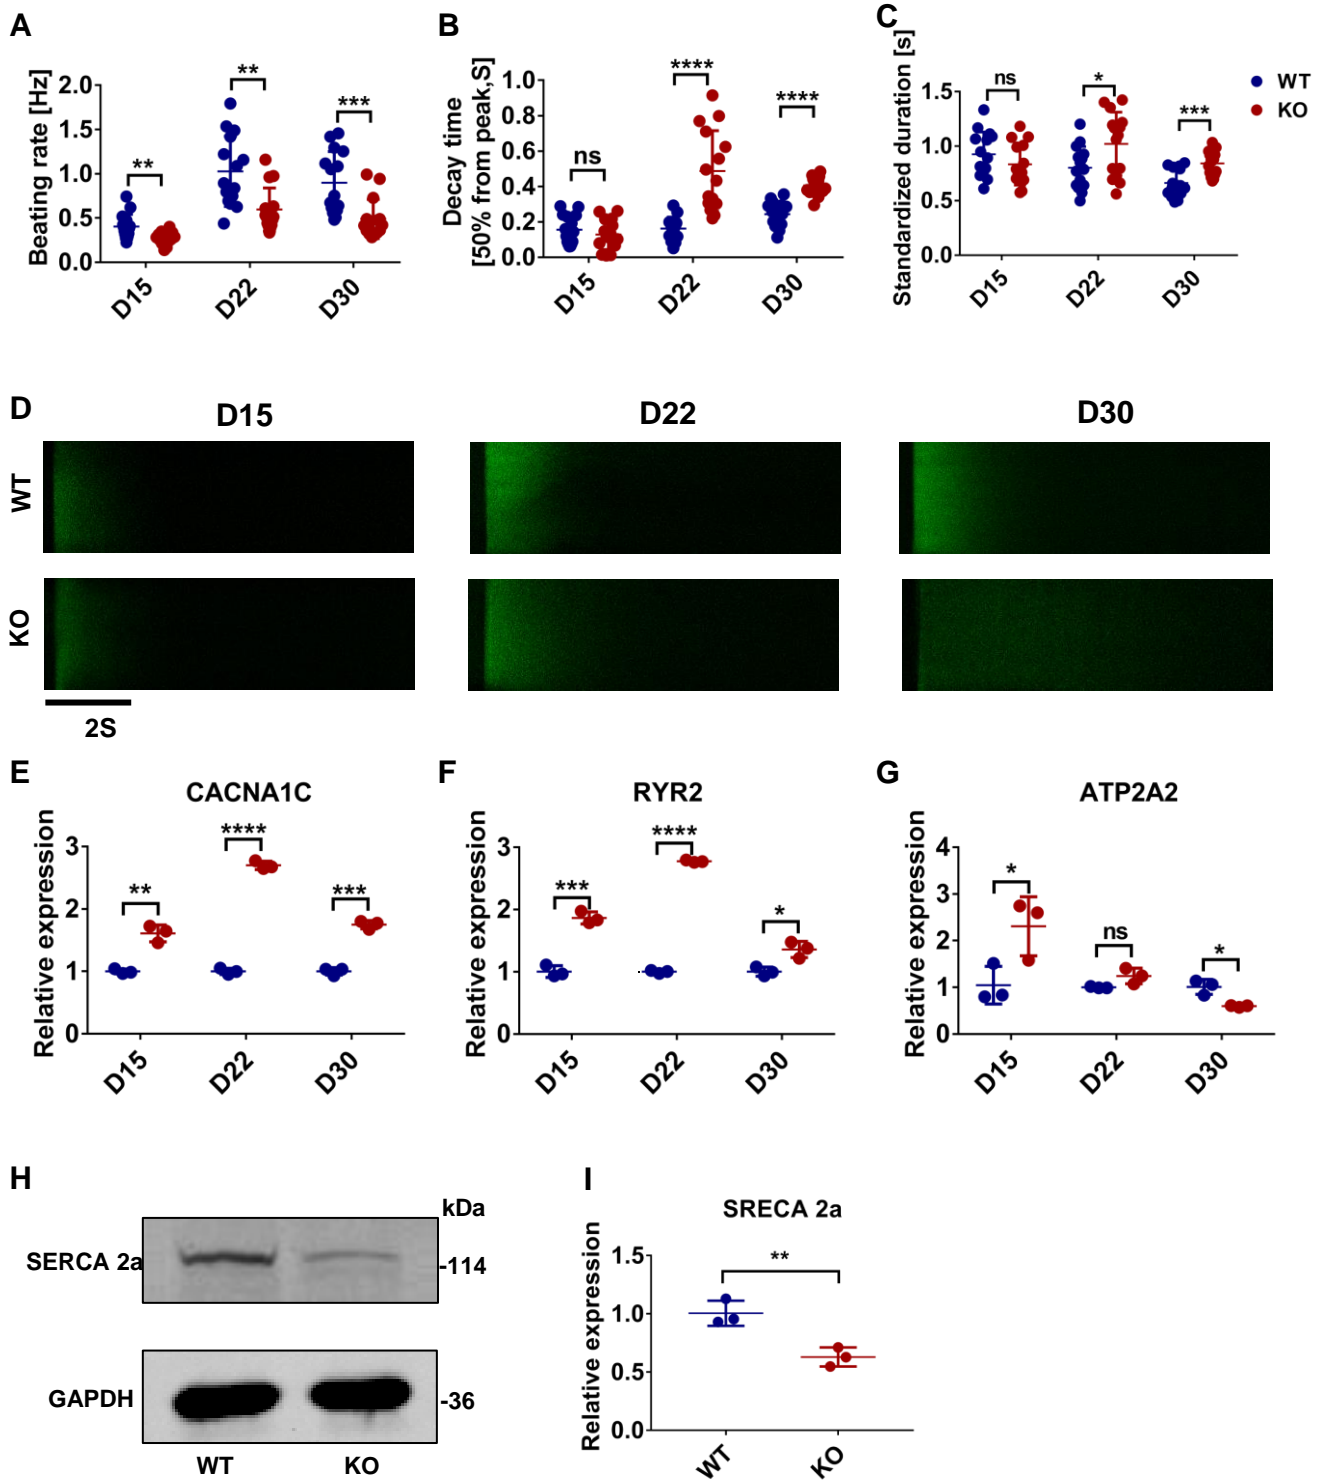

**Figure S4**

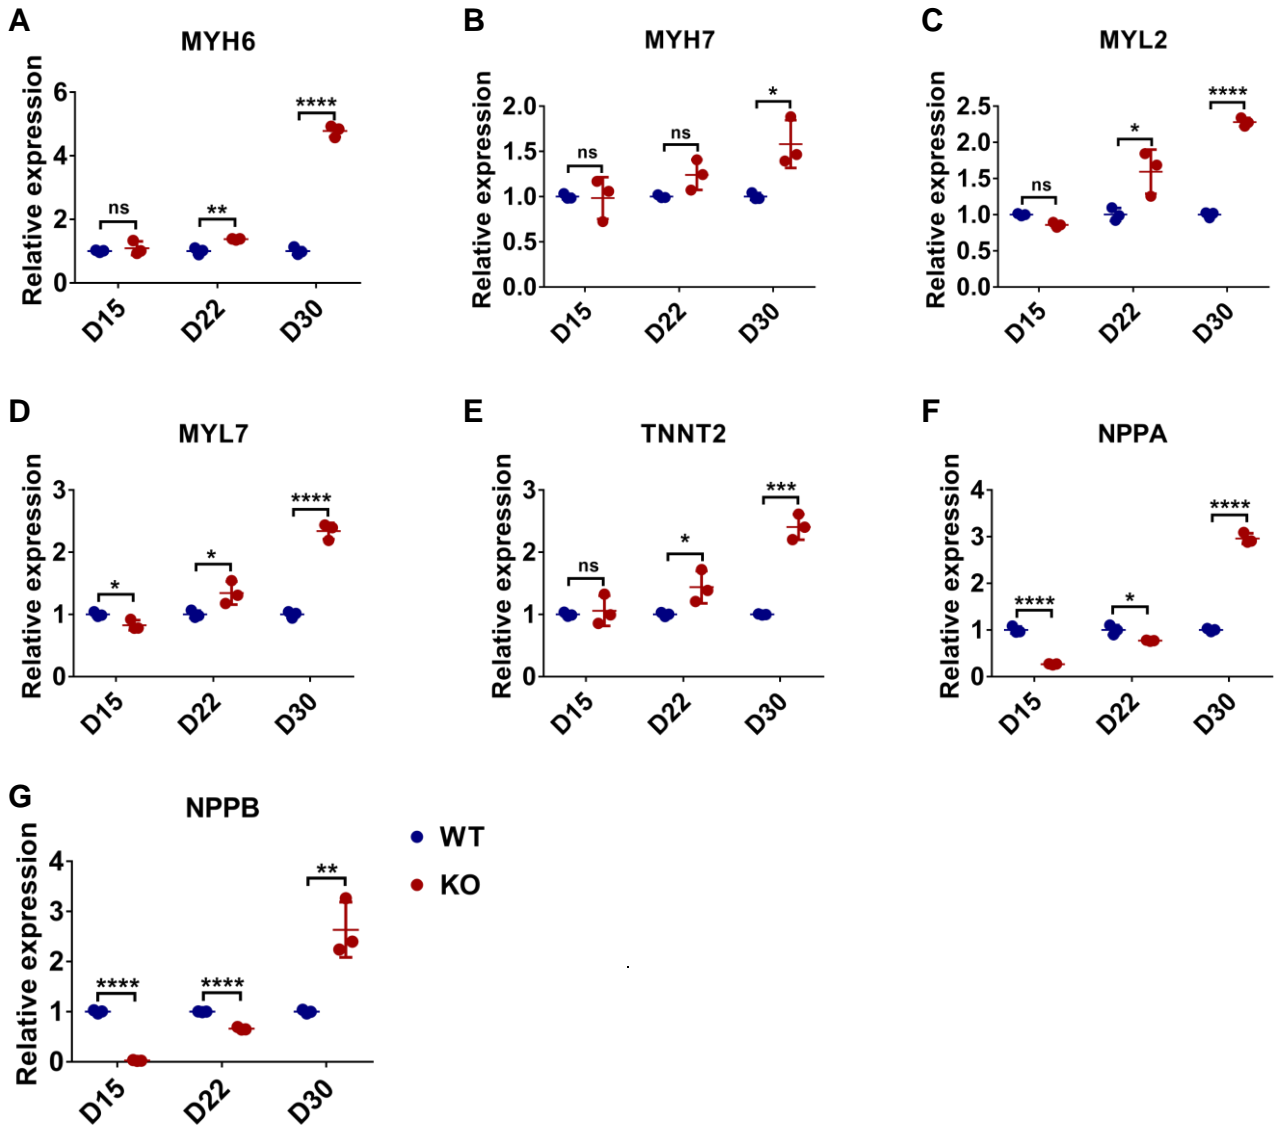

**Figure S5**

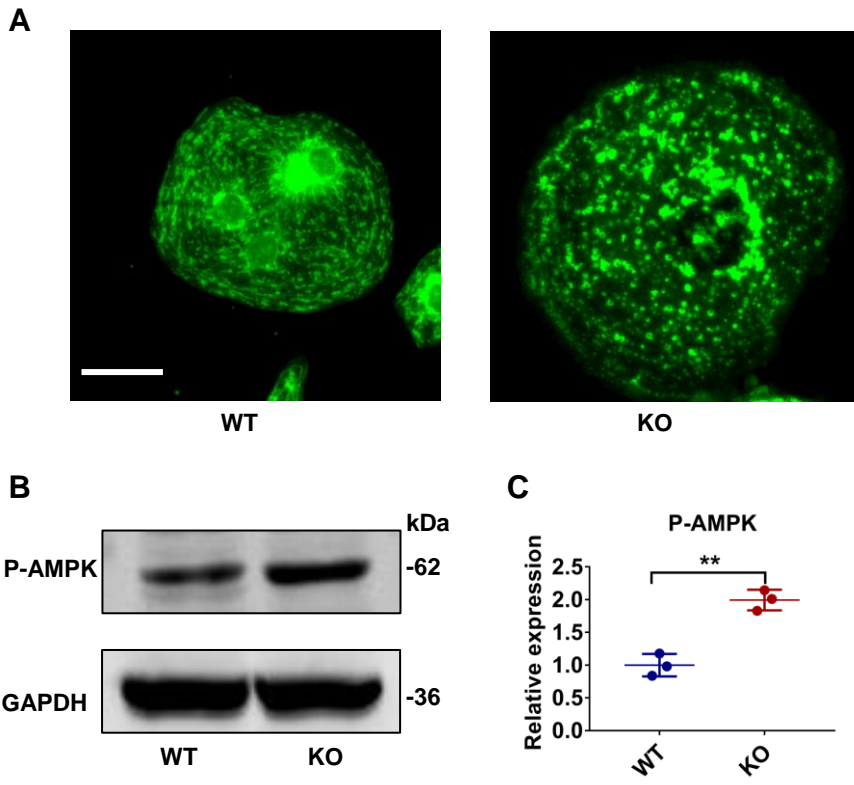

**Figure S6**

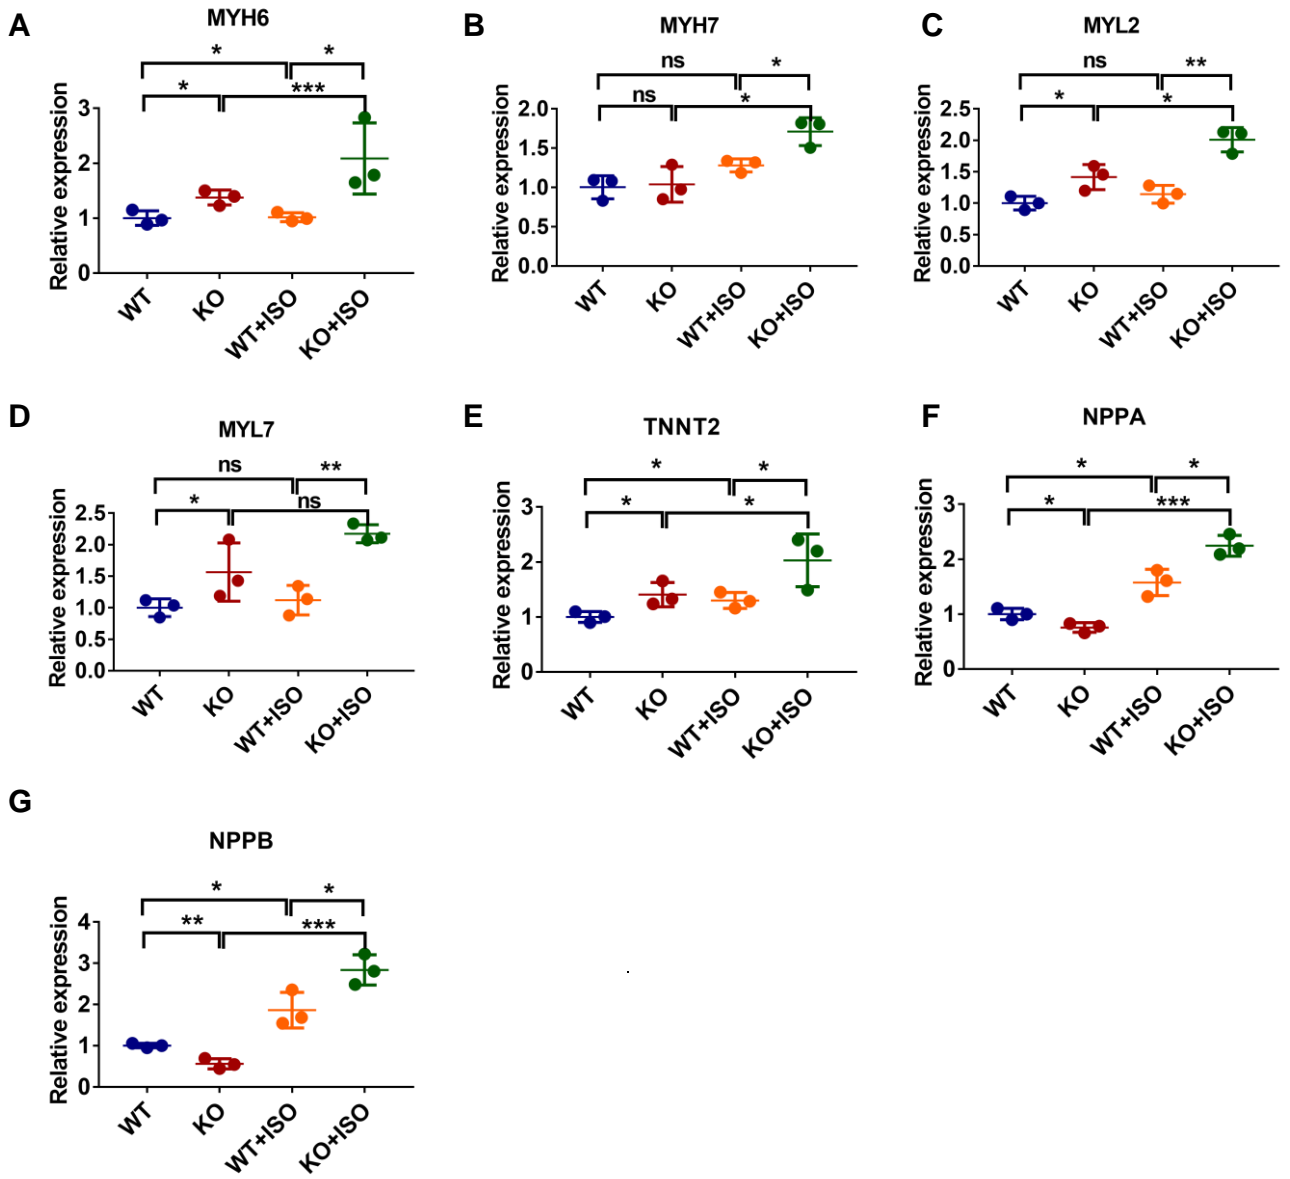

Figure S7

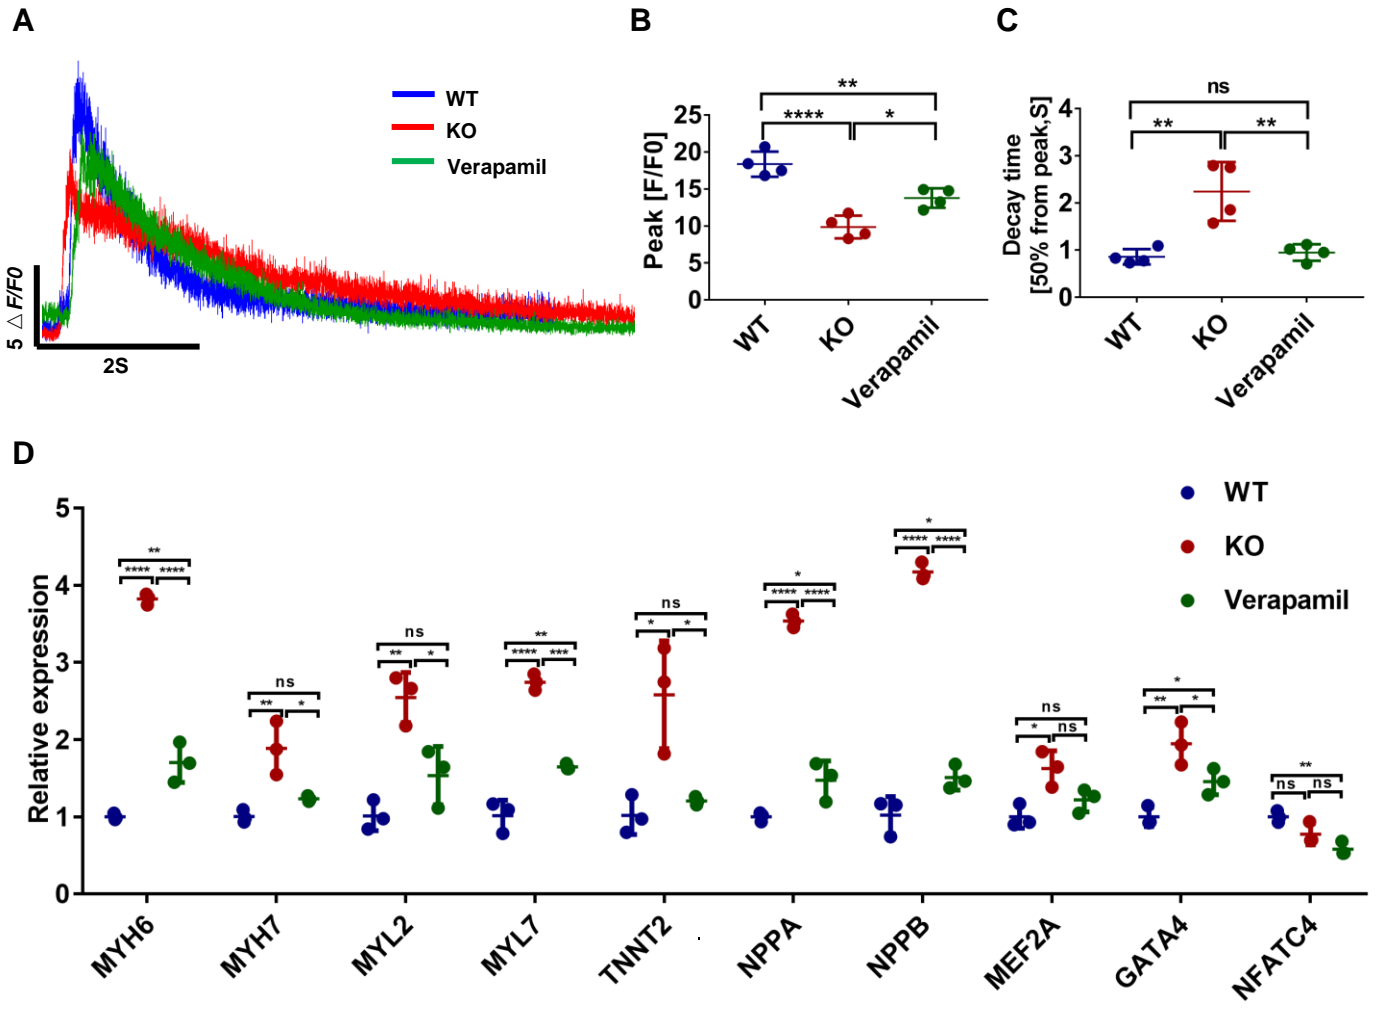

Supplement: 41419_2019_1826_MOESM1_ESM.pdf [file 41419_2019_1826_MOESM1_ESM.pdf]
