# Supplementary material for: MLP-deficient human pluripotent stem cell derived cardiomyocytes develop hypertrophic cardiomyopathy and heart failure phenotypes due to abnormal calcium handling
Source: PubMed Central journal article supplement (PMC6690906; doi:10.1038/s41419-019-1826-4), 2019-08-13
Supplement: 41419_2019_1826_MOESM2_ESM.pdf [file 41419_2019_1826_MOESM2_ESM.pdf]

**Table S1. Primer sequences used for q-PCR**

| Gene           | Forward 5'-3'            | Reverse 3'-5'              |
|----------------|--------------------------|----------------------------|
| <i>ND1</i>     | ATGGCCAACCTCCTACTCCTCATT | TTATGGCGTCAGCGAAGGGTTGTA   |
| <i>ND2</i>     | CCATCTTTGCAGGCACACTCATCA | ATTATGGATGCGGTTGCTTGCGTG   |
| <i>ACTB</i>    | CATGTACGTTGCTATCCAGGC    | CTCCTTAATGTCACGCACGAT      |
| <i>MYH6</i>    | TCTCCGACAACGCCTATCAGTAC  | GTCACCTATGGCTGCAATGCT      |
| <i>MYH7</i>    | GGCAAGACAGTGACCGTGAAG    | CGTAGCGATCCTTGAGGTTGTA     |
| <i>ACTA2</i>   | CTATGCCTCTGGACGCACAACCT  | CAGATCCAGACGCATGATGGCA     |
| <i>NPPA</i>    | ACAATGCCGTGTCCAACGCAGA   | CTTCATTGGCTCACTGAGCAC      |
| <i>NPPB</i>    | TCTGGCTGCTTTGGGAGGAAGA   | CCTTGTGGAATCAGAAGCAGGTG    |
| <i>MYL2</i>    | TACGTTCCGGAAATGCTGAC     | TTCTCCGTGGGTGATGATG        |
| <i>MYL7</i>    | CCGTCTTCCTCACGCTCTT      | TGAACTCATCCTTGTTACCAC      |
| <i>TNNT2</i>   | TTCACCAAAGATCTGCTCCTCGCT | TTATTACTGGTGTGGAGTGGGTGTGG |
| <i>ACTA1</i>   | AGGTCATCACCATCGGCAACGA   | GCTGTTGTAGGTGGTCTCGTGA     |
| <i>GATA4</i>   | GCGGTGCTTCCAGCAACTCCA    | GACATCGCACTGACTGAGAACG     |
| <i>MEF2A</i>   | CAAGGGCATGATGCCTCCACTA   | GCTGAGTACACAAGTCCTTGCG     |
| <i>MEF2C</i>   | TCCACCAGGCAGCAAGAATACG   | GGAGTTGCTACGGAAACCACTG     |
| <i>ATP2B4</i>  | CTCACCGAACTGACCTGTATCG   | GGCTGTGTTGATGTTGTCACCTG    |
| <i>RYR2</i>    | AGAACTTACACACGCGACCTG    | CATCTCTAACCGGACCATACTGC    |
| <i>ATP2A2</i>  | GATCACACCGCTGAATCTG      | AGTATTGCGGGTTGTTCCAG       |
| <i>CACNA1C</i> | CAGAGGCTACGATTTGAGGA     | GCTTCACAAAGAGGTCGTGT       |
| <i>PLN</i>     | AGCACGTCAAAAGCTACAGAATCT | CTGATGTGGCAAGCTGCAGATC     |
| <i>NCX1</i>    | TCGAGATTGTCTCTTCGGGC     | CATATGCAAACACCGAGGCG       |
| <i>CAMK2D</i>  | ACACGGTGACTCCTGAAGCCAA   | GTCTCCTGTCTGTGCATCATGG     |
| <i>PPP3CA</i>  | GCCCTGATGAACCAACAGTTCC   | GCAGGTGGTTCTTTGAATCGGTC    |
| <i>CALM1</i>   | CCAACAGAAGCTGAATTGCAGGA  | CAAAGACTCGGAATGCCTCACG     |
| <i>MCIP1</i>   | GGAAACAAGTGGAAGATGCGACC  | TGTCAGTCGCTGCGTGCAATTC     |
| <i>NFATC4</i>  | GCACCGTATCACAGGCAAGATG   | TCAGGATTCCCGCGCAGTCAAT     |
| <i>COL1A1</i>  | GATTCCCTGGACCTAAAGGTGC   | AGCCTCTCCATCTTTGCCAGCA     |
| <i>COL4A1</i>  | TGTTGACGGCTTACCTGGAGAC   | GGTAGACCAACTCCAGGCTCTC     |
| <i>CUL1</i>    | CAATGACGCTGGCTTTGTGGCT   | CAAGGAGTCACAGTATCGAGCC     |
| <i>BECN1</i>   | CTGGACACTCAGCTCAACGTCA   | CTCTAGTGCCAGCTCCTTTAGC     |
| <i>CHMP2B</i>  | GGCTATAATCAGAGATCGAGCAG  | CTCGTCTTCTGTTTCCGTAGATG    |
| <i>LAMP1</i>   | CGTGTACGAAGGCGTTTTTCAG   | CTGTTCTCGTCCAGCAGACACT     |
| <i>LAMP2</i>   | GGCAATGATACTTGTCTGCTGGC  | GTAGAGCAGTGTGAGAACGGCA     |

|               |                        |                         |
|---------------|------------------------|-------------------------|
| <i>SKP1</i>   | TCCTGAGGAGATTCGCAAGACC | ACTTCTCTTCACACCACTGGTTC |
| <i>FBXO32</i> | CACTGGTCCAAAGAGTCGGCAA | GCACAAAGGCAGGTCAGTGAAG  |
| <i>SCN5A</i>  | CTGACCTCACCATCACTATGTG | GCTGTGAAAATCCCTGTGAAG   |
| <i>KCNH2</i>  | AATCGCCTTCTACCGGAAAG   | CACCATGTCCTTCTCCATCAC   |
| <i>KCNQ1</i>  | TCTGTCTTTGCCATCTCCTTC  | CCTCCATGCGGTCTGAATG     |
| <i>KCNJ2</i>  | AAGACGGTATGAAGTTGGCC   | CGGGTGTGGACTTTACTCTTC   |
| <i>KCNA5</i>  | GTTCCGCATCTTCAAGCTCTCC | CGAAGTAGACGGCACTGGAGAA  |
| <i>CX43</i>   | GGAGATGAGCAGTCTGCCTTTC | TGAGCCAGGTACAAGAGTGTGG  |
| <i>GAPDH</i>  | GGAGCGAGATCCCTCCAAAAT  | GGCTGTTGTCATACTTCTCATGG |
