# Supplementary material for: MLP-deficient human pluripotent stem cell derived cardiomyocytes develop hypertrophic cardiomyopathy and heart failure phenotypes due to abnormal calcium handling
Source: PubMed Central journal article supplement (PMC6690906; doi:10.1038/s41419-019-1826-4), 2019-08-13
Supplement: 41419_2019_1826_MOESM3_ESM.pdf [file 41419_2019_1826_MOESM3_ESM.pdf]

**Table S2. Primary and Secondary Antibodies**

| Type        | Antibody                             | Application        | Dilution          | Species                 | Manufacturer And Catalog Number |
|-------------|--------------------------------------|--------------------|-------------------|-------------------------|---------------------------------|
| Primary     | Anti-OCT4                            | Immunofluorescence | 1:100             | Rabbit Polyclonal       | Santa Cruz sc-9081              |
|             | Anti-TRA-1-81                        | Immunofluorescence | 1:100             | Mouse Monoclonal        | Santa Cruz sc-21706             |
|             | Anti-MLC2v                           | Immunofluorescence | 1:50              | Rabbit Polyclonal       | Proteintech 10906-1-AP          |
|             | Anti- <i>CSRP3</i>                   | Western blot       | 1:1000            | Mouse Monoclonal        | Santa Cruz sc-166930            |
|             | Anti-MLC2a                           | Immunofluorescence | 1:100             | Mouse Monoclonal        | Santa Cruz sc-365255            |
|             | Anti- $\alpha$ -actinin              | Immunofluorescence | 1:100             | Rabbit Polyclonal       | Abcam Ab137346                  |
|             |                                      | Western blot       | 1:1000            |                         |                                 |
|             | Anti-cTnT                            | Immunofluorescence | 1:100             | Mouse Monoclonal        | Abcam Ab8295                    |
|             |                                      | Western blot       | 1:1000            |                         |                                 |
|             |                                      | Flow cytometry     | 1:200             |                         |                                 |
|             | Anti-SERCA 2                         | Western blot       | 1:1000            | Rabbit Monoclonal       | Cell signaling #9580            |
|             | Anti-AMPK                            | Western blot       | 1:1000            | Rabbit Polyclonal       | Abcam Ab39400                   |
|             | Anti-Calcineurin                     | Western blot       | 1:1000            | Rabbit Polyclonal       | Cell signaling #2614            |
|             | Anti-Phospho -CaMKII                 | Western blot       | 1:1000            | Rabbit Monoclonal       | Cell signaling #12716           |
| Anti-CaMKII | Western blot                         | 1:1000             | Rabbit Monoclonal | Abcam Ab52476           |                                 |
| Anti-MYH7   | Western blot                         | 1:1000             | Mouse Monoclonal  | Abcam Ab 174640         |                                 |
| Anti-GAPDH  | Western blot                         | 1:1000             | Mouse Monoclonal  | Santa Cruz sc-365062    |                                 |
|             | Goat anti-Mouse IgG Alexa Fluor 594  | Immunofluorescence | 1:200             | Goat anti-Mouse IgG     | Invitrogen A21145               |
|             | Goat anti-Rabbit IgG Alexa Fluor 488 | Immunofluorescence | 1:200             | Goat anti-Rabbit IgG    | Invitrogen A32731               |
|             | Chicken anti-Rabbit IgG              | Immunofluorescence | 1:200             | Chicken anti-Rabbit IgG | Invitrogen A21442               |

|           |                                          |                    |         |                        |                   |
|-----------|------------------------------------------|--------------------|---------|------------------------|-------------------|
| Secondary | Alexa Fluor 594                          |                    |         |                        |                   |
|           | Chicken anti-Mouse IgG Alexa Fluor 488   | Immunofluorescence | 1:200   | Chicken anti-Mouse IgG | Invitrogen A21200 |
|           | Goat anti-Rabbit IgG (H + L) IRDye 800CW | Western blot       | 1:20000 | Goat anti-Rabbit IgG   | LI-COR 926-32211  |
|           | Goat anti-Mouse IgG (H + L) IRDye 800CW  | Western blot       | 1:20000 | Goat anti-Mouse IgG    | LI-COR 926-32210  |
